# Supplementary material for: New insights into the oxidative dehydrogenation of propane on borate-modified nanodiamond
Source: Royal Society of Chemistry journal article supplement (doi:10.1039/c5cc00588d), 2015-01-01
Supplement: c5cc00588d1.pdf [file c5cc00588d1.pdf]

## Supporting Information

### New Insights into the Oxidative Dehydrogenation of Propane on Borate-Modified Nanodiamond

*Xiaoyan Sun, Yuxiao Ding, Bingsen Zhang, Rui Huang and Dang Sheng Su\**

†Shenyang National Laboratory for Materials Science, Institute of Metal Research, Chinese Academy of Sciences, Shenyang, 110016, Liaoning, China.

#### 1. Materials

The ND used in this study (high purity grade) was supplied by Beijing Grish Hitech Co.China, it was purified from the black powder produced by explosive detonation using a nitric acid-sulfuric acid-fuming sulfuric acid mixture. The diamond powder thus obtained has a light brown color with particle sizes of ca. 3-10 nm, and with a phase purity of powder > 98%. In order to remove the unstable disordered carbon on the surface, ND was then thermally annealed in a furnace at 1000 °C for 4 h under helium flow (defined as AND). The modified catalysts were prepared by incipient-wetness impregnation method. AND was soaked in a controlled amount of  $(\text{NH}_4)_2\text{B}_{10}\text{O}_{16}\cdot 8\text{H}_2\text{O}$  aqueous solution and stirred ultrasonic until to a near-dryness state. The impregnated samples were then dried in air at 120 °C overnight.

#### 2. Characterizations

High-resolution transmission electron microscopy (HRTEM) was performed using a FEI Cs-corrected Titan 80-300 microscope and a FEI Tecnai G2 F20 microscope. Thermogravimetric (TG) was performed on NETZSCH STA 449 F3 under a flow of argon or air ( $50 \text{ ml min}^{-1}$ ) with a heating rate of  $10 \text{ °C min}^{-1}$ . Brunauer-Emmett-Teller (BET) and microporous surface area analysis were determined by  $\text{N}_2$  physisorption at  $-196 \text{ °C}$  on a Micrometrics ASAP 2020 instrument. The samples were outgassed at  $150 \text{ °C}$  for 12 h prior to the isotherm measurement. IR studies were conducted with a Thermo Nicolet iZ10 FTIR system using a diffuse reflectance infrared Fourier-transform (DRIFT) cell that has been extensively modified to allow in-situ

treatments up to 800 °C under flowing gases. The spectra were recorded in the 650–4000  $\text{cm}^{-1}$  wavenumber range with 128 scans at a resolution of 4  $\text{cm}^{-1}$ . The X-ray photoelectron spectroscopy (XPS) measurements were performed on ESCALAB 250 instrument with Al  $K\alpha$  X-rays (1489.6 eV).

### 3. Catalytic tests

Oxidative dehydrogenation of propane (ODH) was carried out in a quartz fixed-bed reactor under atmospheric pressure. The reaction products were analyzed by Agilent 7890A gas chromatograph equipped with a flame ionization detector (FID) for hydrocarbon and a thermal conductivity detector (TCD) for inorganic components. Blank experiments showed that reaction rates were negligible without carbon catalyst. In all tests, carbon mass balances were within  $100 \pm 0.5\%$ .

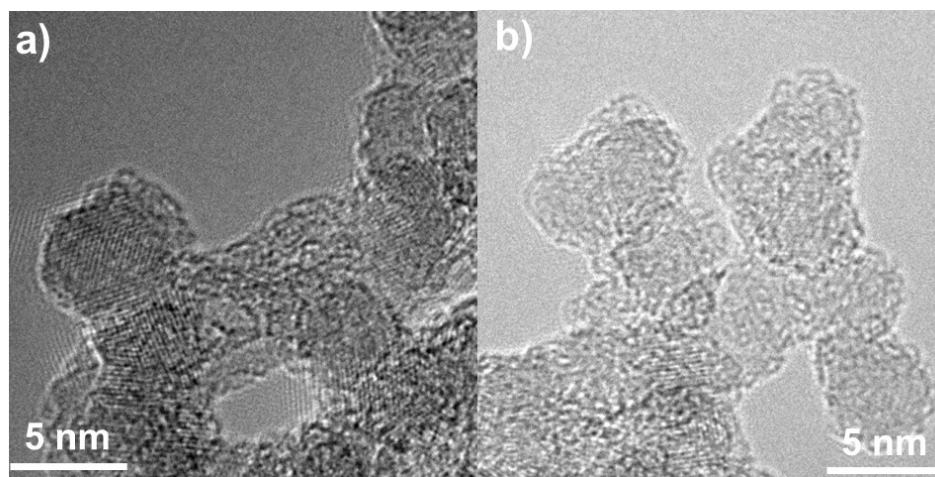

**Figure S1** High-resolution TEM images of a) 5B-AND and b) 15B-AND.

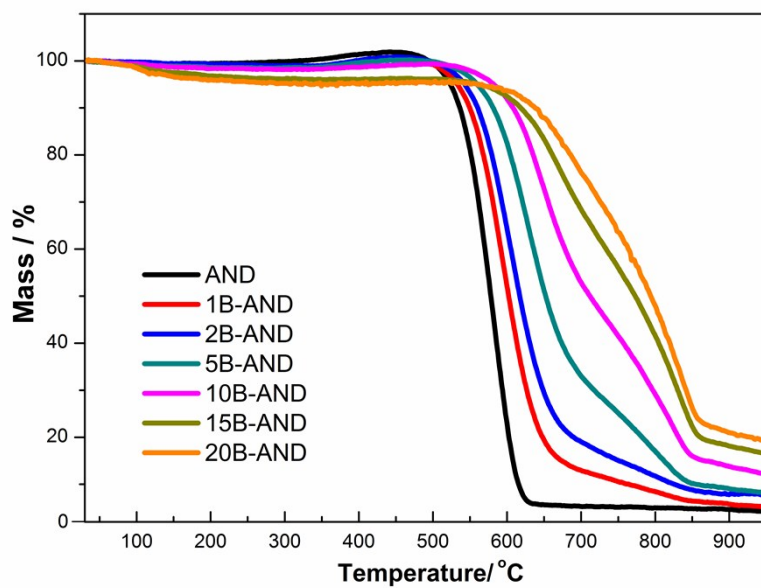

**Figure S2** Dynamic TPO curves from room temperature to 950 °C under air flow, 10 °C/min.

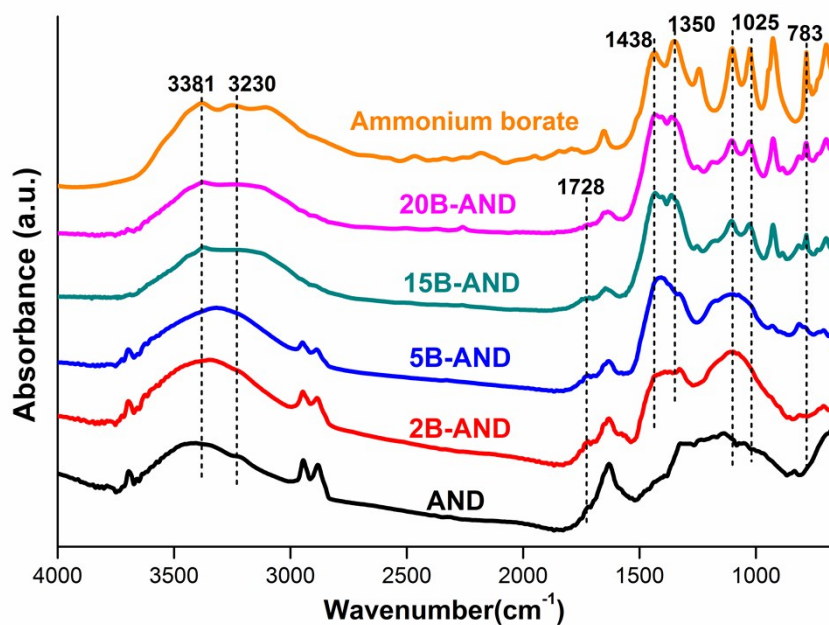

**Figure S3** DRIFT spectra of unmodified and borate-modified ANDs, in which the spectrum of ammonium borate was given as reference.

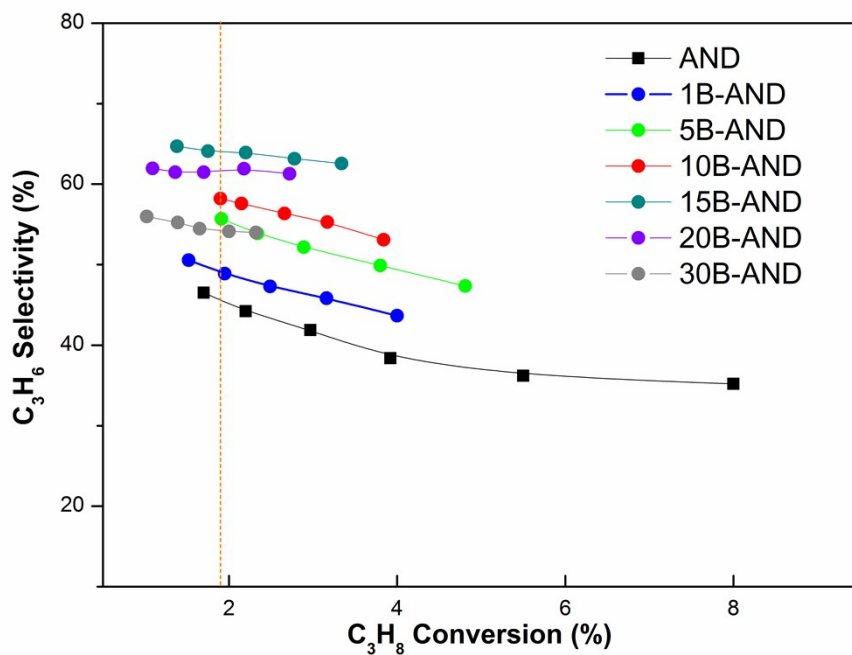

**Figure S4** The propene selectivity versus propane conversion obtained by variation of space velocities. Reaction conditions: 450 °C, catalyst weight: 150-180 mg, 3% $C_3H_8$ , 3% $O_2$ , He balance, total flow rate 10-70 ml/min.

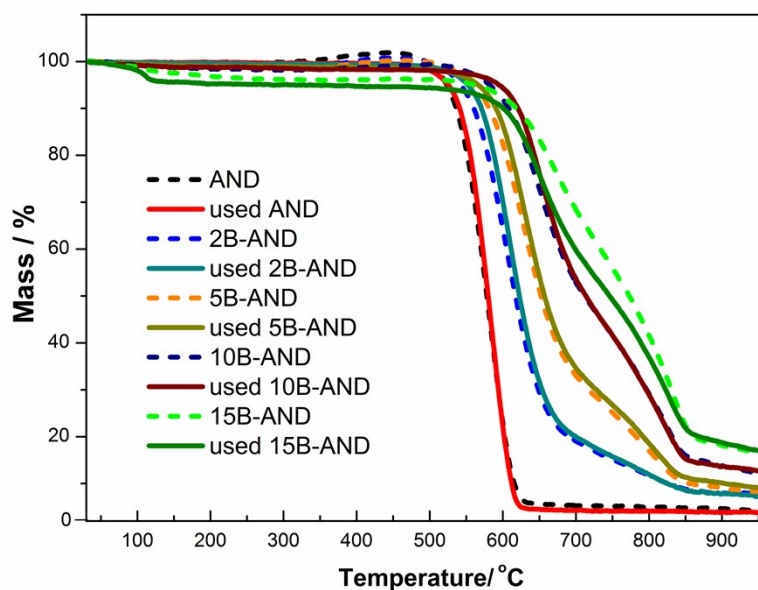

**Figure S5** Comparison of dynamic TPO curves of selected samples before and after ODH reaction from room temperature to 950 °C under air flow, 10 °C/min.

**Table S1** Porous texture of ANDs after ODH reaction.

| Sample  | BET surface area<br>(m <sup>2</sup> /g) | Pore volume<br>(cm <sup>3</sup> /g) | Pore width<br>(nm) |
|---------|-----------------------------------------|-------------------------------------|--------------------|
| AND     | 324                                     | 1.43                                | 17.7               |
| 2B-AND  | 323                                     | 1.26                                | 15.6               |
| 5B-AND  | 324                                     | 1.30                                | 16.0               |
| 10B-AND | 320                                     | 1.17                                | 14.7               |
| 15B-AND | 295                                     | 1.10                                | 15.5               |
| 20B-AND | 211                                     | 0.95                                | 14.2               |

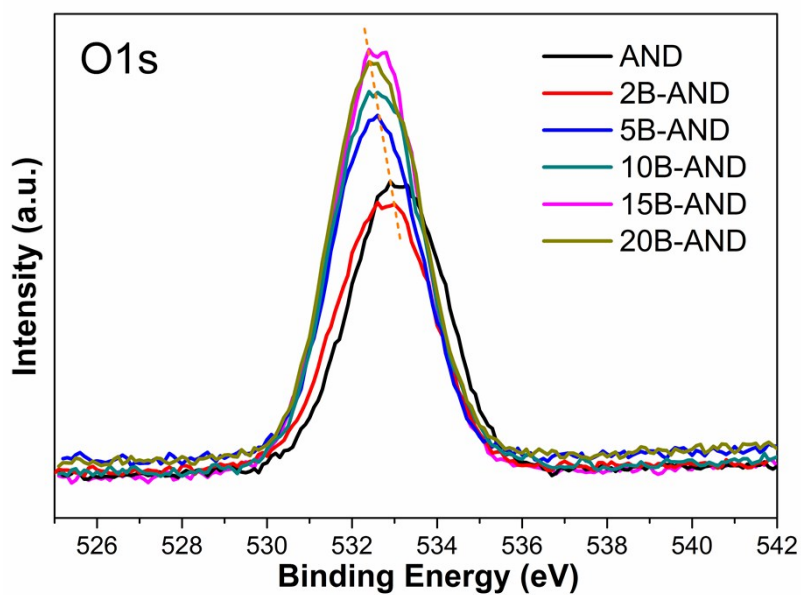

**Figure S6** O1s core level spectra of the selected ANDs after catalysis.
